# Supplementary material for: Present Practice of Radiative Deep Hyperthermia in Combination with Radiotherapy in Switzerland
Source: MDPI journal article supplement (doi:10.3390/cancers14051175), 2022-02-24
Supplement: s1 [file s1]

# Supplementary Material

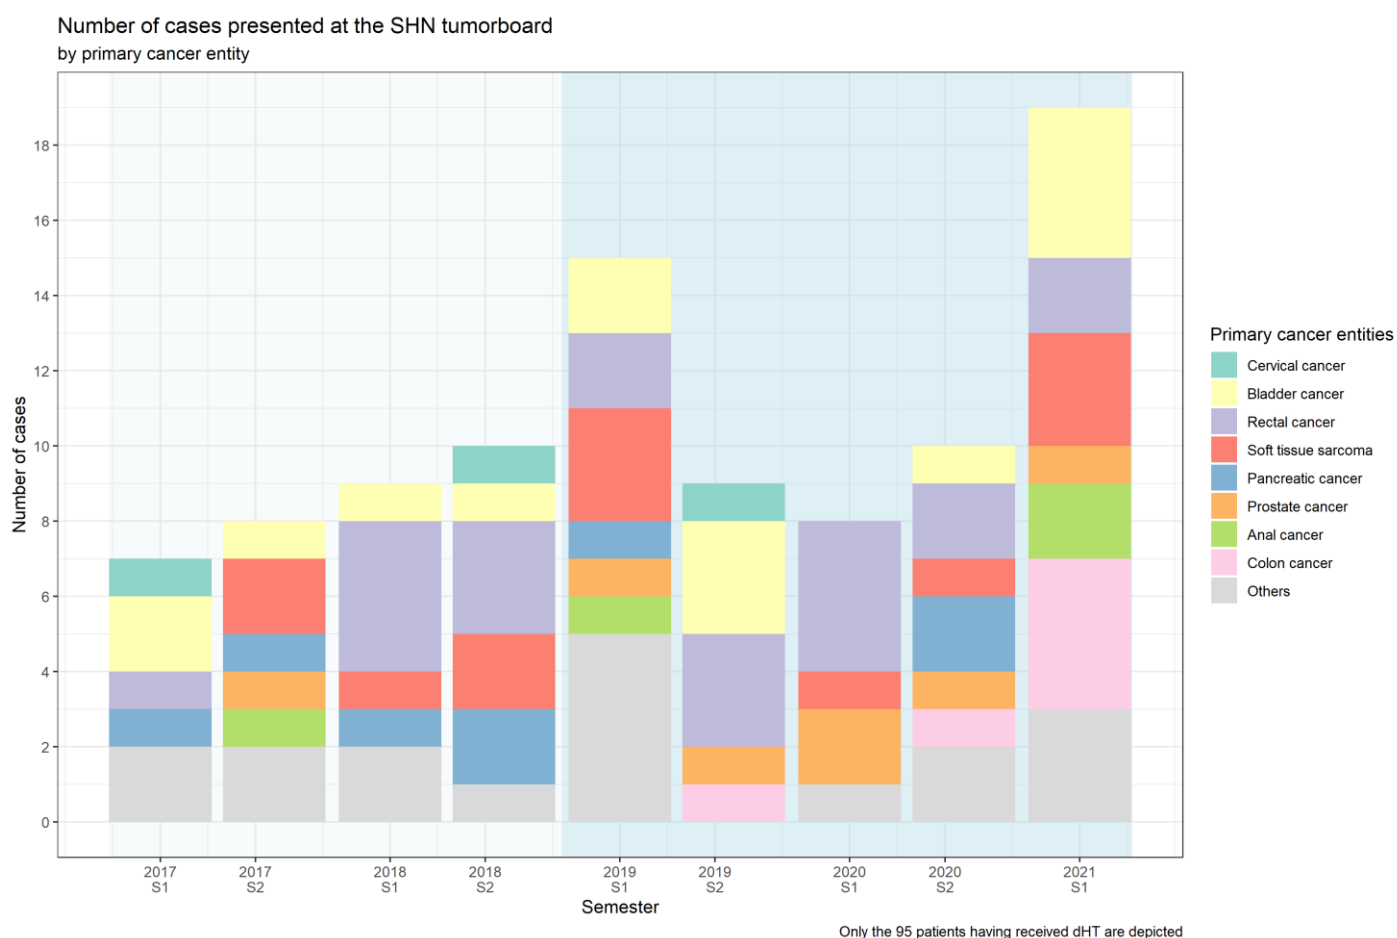

**Figure S1.** Time trend of patients treated with combined deep hyperthermia (dHT) and radiotherapy. Bar chart with patient numbers receiving dHT in the time period from January, 2017 to June, 2021 are depicted per semester (S1 and S2) and basic tumor entity. Two new reimbursed indications were granted as from 2019 (blue shaded background). COVID-19 lockdown in Switzerland was during 1st semester 2020 (11 March to 26 April 2020).

**Table S1.** Patient and tumor characteristics of 24 of 95 patients treated from January, 2017 to June, 2021 with deep hyperthermia and radiotherapy (dHT+RT), who required an individual request for insurance cover. The respective indication for dHT and the reasons why reimbursement was requested are stated. Ten patients (8+2, gray shaded background) were treated from 2017 to 2018 for tumor local recurrence or painful bone metastasis, respectively. During this time period these indications required a request for insurance cover, as they have been only a reimbursed indication since 2019. The other five patients treated with dHT+RT from 2017 to 2018 and the nine patients treated since 2019 are depicted below.

| No. (total 24) | Time Period | Primary Tumor Entity          | Indication for Deep Hyperthermia                   | Treatment Intent | Re-RT | Reason for “Request for Insurance Cover”                              |
|----------------|-------------|-------------------------------|----------------------------------------------------|------------------|-------|-----------------------------------------------------------------------|
| 8              | 2017-2018   | Mixed                         | Tumor recurrence and compression                   | mixed            | mixed | Treated 2017-2018. Indication has been only reimbursed since 2019     |
| 2              | 2017-2018   | Mixed                         | Painful bone metastasis                            | mixed            | mixed | Treated 2017-2018. Indication has been only reimbursed since 2019     |
| 1              | 2017-2018   | Desmoid                       | Recurrent tumor after several treatments           | Curative         | No    | Not a classical sarcoma                                               |
| 1              | 2017-2018   | Chordoma [54]                 | Bulky, radioresistant tumor                        | Curative         | No    | Not a classical sarcoma                                               |
| 1              | 2017-2018   | Ewing Sarcoma                 | Tumor bulk abutting the spinal cord                | Curative         | No    | Not a classical sarcoma. No local recurrence, no palliative situation |
| 1              | 2017-2018   | Endometrial cancer            | Local recurrence in pre-irradiated area            | Curative         | Yes   | Recurrence, but no compression and in a curative setting              |
| 1              | 2017-2018   | CUP                           | Recurrence in pre-irradiated area                  | Curative         | Yes   | Treated with curative intent                                          |
| 1              | Since 2019  | NSCLC                         | Painful bone metastasis in tibia                   | Palliative       | No    | Location was not spine or pelvis                                      |
| 1              | Since 2019  | Prostate cancer               | LN recurrence, Pre-irradiated                      | Palliative       | Yes   | Small LN, and not yet a compression                                   |
| 1              | Since 2019  | Colon cancer                  | Bulky metastasis with compression of aorta         | Palliative       | No    | No recurrence, primary tumor bulk                                     |
| 1              | Since 2019  | Urothelial cancer of ureter   | Bulky disease with compression, dose-limiting area | Curative         | No    | No recurrence, primary tumor bulk, curative intention                 |
| 1              | Since 2019  | Rectal and prostate cancer    | Bulky disease with compression in the pelvis       | Curative         | No    | Double carcinoma                                                      |
| 1              | Since 2019  | Prostate cancer (sarcomatoid) | Bulky disease with compression in the pelvis       | Curative         | Yes   | No recurrence and in curative intention                               |
| 1              | Since 2019  | Prostate cancer               | Recurrence in the pre-irradiated area              | Curative         | Yes   | Treated with curative intention                                       |
| 2              | Since 2019  | Anal cancer                   | Clinical study [49]                                | Curative         | No    | No present indication                                                 |

Abbreviations: CUP: Cancer of unknown primary, LN: Lymph node, NSCLC: Non-small cell lung cancer, Re-RT: Re-irradiation.

**Table S2.** Patient characteristics regarding referral status (column 1-2), re-irradiation status (column 3-4) and by treatment indication (column 5-6). Total numbers are stated in column 7. Due to low case numbers, high volume of multiple testing and too many associated factors, statistical analyses regarding significance of differences would have been statistically inadequate and were therefore omitted.

|                                         | Patients Characteristics by |                                 |                       |             |                     |             |             |
|-----------------------------------------|-----------------------------|---------------------------------|-----------------------|-------------|---------------------|-------------|-------------|
|                                         | Referral status             |                                 | Re-Irradiation Status |             | Treatment Intention |             | Total       |
|                                         | In-house patients           | Referred from external hospital | No                    | Yes         | Curative            | Palliative  |             |
|                                         | (n = 35)                    | (n = 60)                        | (n = 55)              | (n = 40)    | (n = 45)            | (n = 50)    | (n = 95)    |
| <b>Sex</b>                              |                             |                                 |                       |             |                     |             |             |
| Male                                    | 15 (42.9%)                  | 40 (66.7%)                      | 34 (61.8%)            | 21 (52.5%)  | 29 (64.4%)          | 26 (52.0%)  | 55 (57.9%)  |
| Female                                  | 20 (57.1%)                  | 20 (33.3%)                      | 21 (38.2%)            | 19 (47.5%)  | 16 (35.6%)          | 24 (48.0%)  | 40 (42.1%)  |
| <b>Age</b>                              |                             |                                 |                       |             |                     |             |             |
| Mean (SD)                               | 66.4 (12.7)                 | 61.1 (14.7)                     | 63.1 (14.1)           | 63.1 (14.4) | 61.8 (15.3)         | 64.2 (13.1) | 63.1 (14.2) |
| Median [Min, Max]                       | 63 [35, 88]                 | 65 [18, 81]                     | 63 [18, 85]           | 65 [24, 88] | 65 [18, 85]         | 65 [24, 88] | 65 [18, 88] |
| <b>ECOG</b>                             |                             |                                 |                       |             |                     |             |             |
| 0                                       | 13 (37.1%)                  | 34 (56.7%)                      | 38 (69.1%)            | 9 (22.5%)   | 34 (75.6%)          | 13 (26.0%)  | 47 (49.5%)  |
| 1                                       | 16 (45.7%)                  | 23 (38.3%)                      | 13 (23.6%)            | 26 (65.0%)  | 10 (22.2%)          | 29 (58.0%)  | 39 (41.1%)  |
| 2                                       | 6 (17.1%)                   | 3 (5.0%)                        | 4 (7.3%)              | 5 (12.5%)   | 1 (2.2%)            | 8 (16.0%)   | 9 (9.5%)    |
| <b>Reimbursed dHT indications</b>       |                             |                                 |                       |             |                     |             |             |
| Cervical cancer                         | 1 (2.9%)                    | 1 (1.7%)                        | 1 (1.8%)              | 1 (2.5%)    | 2 (4.4%)            | 0 (0%)      | 2 (2.1%)    |
| Bladder cancer                          | 4 (11.4%)                   | 9 (15.0%)                       | 13 (23.6%)            | 0 (0%)      | 12 (26.7%)          | 1 (2.0%)    | 13 (13.7%)  |
| Rectal cancer                           | 3 (8.6%)                    | 11 (18.3%)                      | 4 (7.3%)              | 10 (25.0%)  | 7 (15.6%)           | 7 (14.0%)   | 14 (14.7%)  |
| Soft tissue sarcoma                     | 2 (5.7%)                    | 6 (10.0%)                       | 6 (10.9%)             | 2 (5.0%)    | 7 (15.6%)           | 1 (2.0%)    | 8 (8.4%)    |
| Pancreatic cancer                       | 2 (5.7%)                    | 6 (10.0%)                       | 8 (14.5%)             | 0 (0%)      | 7 (15.6%)           | 1 (2.0%)    | 8 (8.4%)    |
| Local tumor recurrence with compression | 10 (28.6%)                  | 9 (15.0%)                       | 8 (14.5%)             | 11 (27.5%)  | 0 (0%)              | 19 (38.0%)  | 19 (20.0%)  |
| Painful bone metastasis                 | 1 (2.9%)                    | 6 (10.0%)                       | 3 (5.5%)              | 4 (10.0%)   | 0 (0%)              | 7 (14.0%)   | 7 (7.4%)    |

|                                          |            |            |            |            |            |            |            |
|------------------------------------------|------------|------------|------------|------------|------------|------------|------------|
| Request for insurance cover              | 12 (34.3%) | 12 (20.0%) | 12 (21.8%) | 12 (30.0%) | 10 (22.2%) | 14 (28.0%) | 24 (25.3%) |
| <b>Primary cancer entities</b>           |            |            |            |            |            |            |            |
| Cervical cancer                          | 2 (5.7%)   | 1 (1.7%)   | 1 (1.8%)   | 2 (5.0%)   | 2 (4.4%)   | 1 (2.0%)   | 3 (3.2%)   |
| Bladder cancer                           | 6 (17.1%)  | 9 (15.0%)  | 14 (25.5%) | 1 (2.5%)   | 12 (26.7%) | 3 (6.0%)   | 15 (15.8%) |
| Rectal cancer                            | 7 (20.0%)  | 14 (23.3%) | 6 (10.9%)  | 15 (37.5%) | 7 (15.6%)  | 14 (28.0%) | 21 (22.1%) |
| Soft tissue sarcoma                      | 2 (5.7%)   | 11 (18.3%) | 7 (12.7%)  | 6 (15.0%)  | 8 (17.8%)  | 5 (10.0%)  | 13 (13.7%) |
| Pancreatic cancer                        | 2 (5.7%)   | 6 (10.0%)  | 8 (14.5%)  | 0 (0%)     | 7 (15.6%)  | 1 (2.0%)   | 8 (8.4%)   |
| Prostate cancer                          | 5 (14.3%)  | 2 (3.3%)   | 3 (5.5%)   | 4 (10.0%)  | 1 (2.2%)   | 6 (12.0%)  | 7 (7.4%)   |
| Anal cancer                              | 1 (2.9%)   | 3 (5.0%)   | 2 (3.6%)   | 2 (5.0%)   | 2 (4.4%)   | 2 (4.0%)   | 4 (4.2%)   |
| Colon cancer                             | 1 (2.9%)   | 5 (8.3%)   | 4 (7.3%)   | 2 (5.0%)   | 1 (2.2%)   | 5 (10.0%)  | 6 (6.3%)   |
| Others                                   | 9 (25.7%)  | 9 (15.0%)  | 10 (18.2%) | 8 (20.0%)  | 5 (11.1%)  | 13 (26.0%) | 18 (18.9%) |
| <b>Treatment intention</b>               |            |            |            |            |            |            |            |
| Curative                                 | 15 (42.9%) | 30 (50.0%) | 37 (67.3%) | 8 (20.0%)  | ---        | ---        | 45 (47.4%) |
| Palliative                               | 20 (57.1%) | 30 (50.0%) | 18 (32.7%) | 32 (80.0%) | ---        | ---        | 50 (52.6%) |
| <b>Re-irradiation</b>                    |            |            |            |            |            |            |            |
| No                                       | 22 (62.9%) | 33 (55.0%) | ---        | ---        | 37 (82.2%) | 18 (36.0%) | 55 (57.9%) |
| Yes                                      | 13 (37.1%) | 27 (45.0%) | ---        | ---        | 8 (17.8%)  | 32 (64.0%) | 40 (42.1%) |
| <b>Treatment within a study protocol</b> |            |            |            |            |            |            |            |
| No                                       | 28 (80.0%) | 38 (63.3%) | 32 (58.2%) | 34 (85.0%) | 20 (44.4%) | 46 (92.0%) | 66 (69.5%) |
| Yes                                      | 1 (2.9%)   | 6 (10.0%)  | 7 (12.7%)  | 0 (0%)     | 7 (15.6%)  | 0 (0%)     | 7 (7.4%)   |
| Analogous to protocol                    | 6 (17.1%)  | 16 (26.7%) | 16 (29.1%) | 6 (15.0%)  | 18 (40.0%) | 4 (8.0%)   | 22 (23.2%) |
| <b>Patient origin</b>                    |            |            |            |            |            |            |            |
| In-house patient                         | ---        | ---        | 22 (40.0%) | 13 (32.5%) | 15 (33.3%) | 20 (40.0%) | 35 (36.8%) |
| Referred from external hospital          | ---        | ---        | 33 (60.0%) | 27 (67.5%) | 30 (66.7%) | 30 (60.0%) | 60 (63.2%) |
| <b>Patient origin (specified)</b>        |            |            |            |            |            |            |            |
| Intra-cantonal                           | ---        | 25 (42.4%) | 19 (57.6%) | 6 (23.1%)  | 16 (53.3%) | 9 (31.0%)  | 25 (42.4%) |
| Extra-cantonal                           | ---        | 34 (57.6%) | 14 (42.4%) | 20 (76.9%) | 14 (46.7%) | 20 (69.0%) | 34 (57.6%) |

| <b>Distance to referring hospital (km)</b>                                   |            |              |              |              |              |              |              |
|------------------------------------------------------------------------------|------------|--------------|--------------|--------------|--------------|--------------|--------------|
| Median [Min, Max]                                                            | ---        | 42 [23, 238] | 27 [23, 238] | 48 [23, 238] | 30 [23, 238] | 48 [23, 238] | 42 [23, 238] |
| Mean (SD)                                                                    | ---        | 61.5 (54.3)  | 48.6 (47.7)  | 76.0 (58.3)  | 49.4 (46.1)  | 72.5 (59.4)  | 61.5 (54.3)  |
| <b>Place of treatment</b>                                                    |            |              |              |              |              |              |              |
| RT at referring institution, dHT at KSA                                      | 0 (0%)     | 40 (66.7%)   | 23 (41.8%)   | 17 (42.5%)   | 20 (44.4%)   | 20 (40.0%)   | 40 (42.1%)   |
| dHT+RT at KSA                                                                | 35 (100%)  | 14 (23.3%)   | 30 (54.5%)   | 19 (47.5%)   | 22 (48.9%)   | 27 (54.0%)   | 49 (51.6%)   |
| HT and only RT at the same day at KSA, remaining RT at referring institution | 0 (0%)     | 6 (10.0%)    | 2 (3.6%)     | 4 (10.0%)    | 3 (6.7%)     | 3 (6.0%)     | 6 (6.3%)     |
| <b>All prescribed dHT sessions received</b>                                  |            |              |              |              |              |              |              |
| No                                                                           | 1 (2.9%)   | 5 (8.3%)     | 5 (9.1%)     | 1 (2.5%)     | 4 (8.9%)     | 2 (4.0%)     | 6 (6.3%)     |
| Yes                                                                          | 34 (97.1%) | 55 (91.7%)   | 50 (90.9%)   | 39 (97.5%)   | 41 (91.1%)   | 48 (96.0%)   | 89 (93.7%)   |

Abbreviations: ECOG: Eastern Cooperative Oncology Group, dHT: Deep hyperthermia, dHT+RT: deep hyperthermia with radiotherapy, SD: standard deviation, Tx: treatment, RT: radiotherapy, KSA: Kantonsspital Aarau.

**Table S3.** Patient (A) and treatment characteristics (B) are depicted according to treatment protocol. “No” means that the patient was treated in routine clinical practice. “Yes” means that the patient was treated within a clinical trial. A patient treated “analogous to a protocol” means that (1) he could not have been included in the protocol due to contraindications but was treated according to protocol, or (2) that this protocol had not been opened at the Kantonsspital Aarau, or (3) that the protocol had already closed to recruitment, or (4) the study treatment schedule had to be adapted for an individualized approach. Due to low case numbers, high volume of multiple testing and too many associated factors, statistical analyses regarding significance of differences would have been statistically inadequate and were therefore omitted.

| S3 A                                    | Patient Characteristics by Protocol Status |             |                       |             |
|-----------------------------------------|--------------------------------------------|-------------|-----------------------|-------------|
|                                         | No                                         | Yes         | Analogous to Protocol | Total       |
|                                         | (n = 66)                                   | (n = 7)     | (n = 22)              | (n = 95)    |
| <b>Sex</b>                              |                                            |             |                       |             |
| Male                                    | 35 (53.0%)                                 | 6 (85.7%)   | 14 (63.6%)            | 55 (57.9%)  |
| Female                                  | 31 (47.0%)                                 | 1 (14.3%)   | 8 (36.4%)             | 40 (42.1%)  |
| <b>Age</b>                              |                                            |             |                       |             |
| Mean (SD)                               | 64.3 (14.3)                                | 66.0 (7.55) | 58.6 (14.9)           | 63.1 (14.2) |
| Median [Min, Max]                       | 68 [24, 88]                                | 64 [57, 80] | 60 [18, 85]           | 65 [18, 88] |
| <b>ECOG</b>                             |                                            |             |                       |             |
| 0                                       | 26 (39.4%)                                 | 6 (85.7%)   | 15 (68.2%)            | 47 (49.5%)  |
| 1                                       | 32 (48.5%)                                 | 1 (14.3%)   | 6 (27.3%)             | 39 (41.1%)  |
| 2                                       | 8 (12.1%)                                  | 0 (0%)      | 1 (4.5%)              | 9 (9.5%)    |
| <b>Reimbursed dHT indications</b>       |                                            |             |                       |             |
| Cervical cancer                         | 2 (3.0%)                                   | 0 (0%)      | 0 (0%)                | 2 (2.1%)    |
| Bladder cancer                          | 6 (9.1%)                                   | 3 (42.9%)   | 4 (18.2%)             | 13 (13.7%)  |
| Rectal cancer                           | 6 (9.1%)                                   | 0 (0%)      | 8 (36.4%)             | 14 (14.7%)  |
| Soft tissue sarcoma                     | 7 (10.6%)                                  | 0 (0%)      | 1 (4.5%)              | 8 (8.4%)    |
| Pancreatic cancer                       | 0 (0%)                                     | 2 (28.6%)   | 6 (27.3%)             | 8 (8.4%)    |
| Local tumor recurrence with compression | 19 (28.8%)                                 | 0 (0%)      | 0 (0%)                | 19 (20.0%)  |
| Painful bone metastasis                 | 7 (10.6%)                                  | 0 (0%)      | 0 (0%)                | 7 (7.4%)    |
| Request for insurance cover             | 19 (28.8%)                                 | 2 (28.6%)   | 3 (13.6%)             | 24 (25.3%)  |
| <b>Primary cancer entities</b>          |                                            |             |                       |             |
| Cervical cancer                         | 3 (4.5%)                                   | 0 (0%)      | 0 (0%)                | 3 (3.2%)    |
| Bladder cancer                          | 8 (12.1%)                                  | 3 (42.9%)   | 4 (18.2%)             | 15 (15.8%)  |
| Rectal cancer                           | 13 (19.7%)                                 | 0 (0%)      | 8 (36.4%)             | 21 (22.1%)  |
| Soft tissue sarcoma                     | 12 (18.2%)                                 | 0 (0%)      | 1 (4.5%)              | 13 (13.7%)  |
| Pancreatic cancer                       | 0 (0%)                                     | 2 (28.6%)   | 6 (27.3%)             | 8 (8.4%)    |
| Prostate cancer                         | 7 (10.6%)                                  | 0 (0%)      | 0 (0%)                | 7 (7.4%)    |
| Anal cancer                             | 2 (3.0%)                                   | 2 (28.6%)   | 0 (0%)                | 4 (4.2%)    |
| Colon cancer                            | 5 (7.6%)                                   | 0 (0%)      | 1 (4.5%)              | 6 (6.3%)    |

|                                                                           |              |             |              |              |
|---------------------------------------------------------------------------|--------------|-------------|--------------|--------------|
| Others                                                                    | 16 (24.2%)   | 0 (0%)      | 2 (9.1%)     | 18 (18.9%)   |
| <b>Treatment intention</b>                                                |              |             |              |              |
| Curative                                                                  | 20 (30.3%)   | 7 (100%)    | 18 (81.8%)   | 45 (47.4%)   |
| Palliative                                                                | 46 (69.7%)   | 0 (0%)      | 4 (18.2%)    | 50 (52.6%)   |
| <b>Re-irradiation</b>                                                     |              |             |              |              |
| No                                                                        | 32 (48.5%)   | 7 (100%)    | 16 (72.7%)   | 55 (57.9%)   |
| Yes                                                                       | 34 (51.5%)   | 0 (0%)      | 6 (27.3%)    | 40 (42.1%)   |
| <b>Patient origin</b>                                                     |              |             |              |              |
| In-house patient                                                          | 28 (42.4%)   | 1 (14.3%)   | 6 (27.3%)    | 35 (36.8%)   |
| Referred from external hospital                                           | 38 (57.6%)   | 6 (85.7%)   | 16 (72.7%)   | 60 (63.2%)   |
| <b>Patient origin (specified)</b>                                         |              |             |              |              |
| Intra-cantonal                                                            | 13 (35.1%)   | 3 (50.0%)   | 9 (56.3%)    | 25 (42.4%)   |
| Extra-cantonal                                                            | 24 (64.9%)   | 3 (50.0%)   | 7 (43.8%)    | 34 (57.6%)   |
| <b>Distance to referring hospital (km)</b>                                |              |             |              |              |
| Median [Min, Max]                                                         | 48 [23, 238] | 33 [23, 59] | 30 [23, 116] | 42 [23, 238] |
| Mean (SD)                                                                 | 71.5 (61.4)  | 36.8 (17.3) | 43.0 (31.1)  | 61.5 (54.3)  |
| <b>Place of treatment</b>                                                 |              |             |              |              |
| RT at referring institution, dHT at KSA                                   | 25 (37.9%)   | 2 (28.6%)   | 13 (59.1%)   | 40 (42.1%)   |
| dHT+RT at KSA                                                             | 37 (56.1%)   | 5 (71.4%)   | 7 (31.8%)    | 49 (51.6%)   |
| HT and only RT at the same day at KSA, remaining RT at referring hospital | 4 (6.1%)     | 0 (0%)      | 2 (9.1%)     | 6 (6.3%)     |
| <b>All prescribed dHT sessions received</b>                               |              |             |              |              |
| No                                                                        | 4 (6.1%)     | 2 (28.6%)   | 0 (0%)       | 6 (6.3%)     |
| Yes                                                                       | 62 (93.9%)   | 5 (71.4%)   | 22 (100%)    | 89 (93.7%)   |

| S3 B                              | Treatment Characteristics by Protocol Status |                   |                       |                 |
|-----------------------------------|----------------------------------------------|-------------------|-----------------------|-----------------|
|                                   | No                                           | Yes               | Analogous to Protocol | Total           |
|                                   | (n = 65)                                     | (n = 7)           | (n = 22)              | (n = 94)        |
| <b>HT frequency</b>               |                                              |                   |                       |                 |
| Once per week                     | 30 (46.2%)                                   | 5 (71.4%)         | 14 (63.6%)            | 49 (52.1%)      |
| Once to twice per week            | 35 (53.8%)                                   | 2 (28.6%)         | 8 (36.4%)             | 45 (47.9%)      |
| <b>Nos. of dHT sessions</b>       |                                              |                   |                       |                 |
| Mean (SD)                         | 4.94 (1.99)                                  | 4.71 (2.14)       | 6.32 (1.32)           | 5.24 (1.94)     |
| Median [Min, Max]                 | 5 [1, 10]                                    | 6 [1, 7]          | 6 [4, 10]             | 5 [1, 10]       |
| <b>Total nos. of RT fractions</b> |                                              |                   |                       |                 |
| Mean (SD)                         | 18.7 (8.92)                                  | 29.7 (1.60)       | 27.9 (4.07)           | 21.7 (8.89)     |
| Median [Min, Max]                 | 16 [4, 35]                                   | 31 [28, 31]       | 28 [20, 38]           | 25 [4, 38]      |
| <b>Dose/fraction (Gy)</b>         |                                              |                   |                       |                 |
| Mean (SD)                         | 2.75 (1.55)                                  | 1.86 (0.0976)     | 1.93 (0.207)          | 2.49 (1.35)     |
| Median [Min, Max]                 | 2.15 [1.8, 9]                                | 1.80 [1.8, 2]     | 1.80 [1.8, 2.5]       | 2.00 [1.8, 9]   |
| <b>Boost included</b>             |                                              |                   |                       |                 |
| No                                | 56 (86.2%)                                   | 3 (42.9%)         | 16 (72.7%)            | 75 (79.8%)      |
| Yes                               | 9 (13.8%)                                    | 4 (57.1%)         | 6 (27.3%)             | 19 (20.2%)      |
| <b>Total dose (Gy)</b>            |                                              |                   |                       |                 |
| Mean (SD)                         | 42.6 (13.0)                                  | 55.4 (2.38)       | 53.7 (9.09)           | 46.2 (12.8)     |
| Median [Min, Max]                 | 45.0 [12.5, 71]                              | 55.8 [50.4, 58.2] | 54.9 [36, 76]         | 50.0 [12.5, 76] |
| <b>RT interval</b>                |                                              |                   |                       |                 |
| 1x/week                           | 1 (1.5%)                                     | 0 (0%)            | 0 (0%)                | 1 (1.1%)        |
| 2x/week                           | 6 (9.2%)                                     | 0 (0%)            | 0 (0%)                | 6 (6.4%)        |
| 3x/week                           | 0 (0%)                                       | 0 (0%)            | 0 (0%)                | 0 (0%)          |
| 4x/week                           | 9 (13.8%)                                    | 0 (0%)            | 0 (0%)                | 9 (9.6%)        |
| 5x/week                           | 49 (75.4%)                                   | 7 (100%)          | 22 (100%)             | 78 (83.0%)      |
| <b>RT modality</b>                |                                              |                   |                       |                 |
| EBRT                              | 53 (81.5%)                                   | 7 (100%)          | 19 (86.4%)            | 79 (84.0%)      |
| HDR - brachytherapy               | 4 (6.2%)                                     | 0 (0%)            | 0 (0%)                | 4 (4.3%)        |
| Protons                           | 6 (9.2%)                                     | 0 (0%)            | 3 (13.6%)             | 9 (9.6%)        |
| SBRT                              | 2 (3.1%)                                     | 0 (0%)            | 0 (0%)                | 2 (2.1%)        |

One patient stopped treatment very early and was excluded from the treatment characteristics table.

Abbreviations: EBRT: external body radiotherapy, ECOG: Eastern Cooperative Oncology Group, fx: fraction, Gy: Gray, HDR: high dose rate, HT: hyperthermia, KSA: Kantonsspital Aarau (dHT center), RT: radiotherapy, SBRT: stereotactic body radiotherapy, SD: standard deviation, Tx: treatment.



**Table S4.** Patient characteristics are depicted by gender. Due to low case numbers, high volume of multiple testing and too many associated factors, statistical analyses regarding significance of differences would have been statistically inadequate and were therefore omitted.

| Patient Characteristics by Gender       |             |             |             |
|-----------------------------------------|-------------|-------------|-------------|
|                                         | Male        | Female      | Total       |
|                                         | (n = 55)    | (n = 40)    | (n = 95)    |
| <b>Age</b>                              |             |             |             |
| Mean (SD)                               | 66.2 (13.3) | 58.8 (14.3) | 63.1 (14.2) |
| Median [Min, Max]                       | 68 [18, 88] | 61 [24, 85] | 65 [18, 88] |
| <b>ECOG</b>                             |             |             |             |
| 0                                       | 30 (54.5%)  | 17 (42.5%)  | 47 (49.5%)  |
| 1                                       | 22 (40.0%)  | 17 (42.5%)  | 39 (41.1%)  |
| 2                                       | 3 (5.5%)    | 6 (15.0%)   | 9 (9.5%)    |
| <b>Reimbursed dHT indications</b>       |             |             |             |
| Cervical cancer                         | 0 (0%)      | 2 (5.0%)    | 2 (2.1%)    |
| Bladder cancer                          | 11 (20.0%)  | 2 (5.0%)    | 13 (13.7%)  |
| Rectal cancer                           | 8 (14.5%)   | 6 (15.0%)   | 14 (14.7%)  |
| Soft tissue sarcoma                     | 4 (7.3%)    | 4 (10.0%)   | 8 (8.4%)    |
| Pancreatic cancer                       | 5 (9.1%)    | 3 (7.5%)    | 8 (8.4%)    |
| Local tumor recurrence with compression | 7 (12.7%)   | 12 (30.0%)  | 19 (20.0%)  |
| Painful bone metastasis                 | 6 (10.9%)   | 1 (2.5%)    | 7 (7.4%)    |
| Request for insurance cover             | 14 (25.5%)  | 10 (25.0%)  | 24 (25.3%)  |
| <b>Primary cancer entities</b>          |             |             |             |
| Cervical cancer                         | 0 (0%)      | 3 (7.5%)    | 3 (3.2%)    |
| Bladder cancer                          | 11 (20.0%)  | 4 (10.0%)   | 15 (15.8%)  |
| Rectal cancer                           | 14 (25.5%)  | 7 (17.5%)   | 21 (22.1%)  |
| Soft tissue sarcoma                     | 8 (14.5%)   | 5 (12.5%)   | 13 (13.7%)  |
| Pancreatic cancer                       | 5 (9.1%)    | 3 (7.5%)    | 8 (8.4%)    |
| Prostate cancer                         | 7 (12.7%)   | 0 (0%)      | 7 (7.4%)    |
| Anal cancer                             | 1 (1.8%)    | 3 (7.5%)    | 4 (4.2%)    |
| Colon cancer                            | 1 (1.8%)    | 5 (12.5%)   | 6 (6.3%)    |
| Others                                  | 8 (14.5%)   | 10 (25.0%)  | 18 (18.9%)  |
| <b>Treatment intention</b>              |             |             |             |
| Curative                                | 29 (52.7%)  | 16 (40.0%)  | 45 (47.4%)  |
| Palliative                              | 26 (47.3%)  | 24 (60.0%)  | 50 (52.6%)  |
| <b>Re-irradiation</b>                   |             |             |             |
| No                                      | 34 (61.8%)  | 21 (52.5%)  | 55 (57.9%)  |
| Yes                                     | 21 (38.2%)  | 19 (47.5%)  | 40 (42.1%)  |

|                                                                              |              |              |              |
|------------------------------------------------------------------------------|--------------|--------------|--------------|
| <b>Treatment within a study protocol</b>                                     |              |              |              |
| No                                                                           | 35 (63.6%)   | 31 (77.5%)   | 66 (69.5%)   |
| Yes                                                                          | 6 (10.9%)    | 1 (2.5%)     | 7 (7.4%)     |
| Analogous to protocol                                                        | 14 (25.5%)   | 8 (20.0%)    | 22 (23.2%)   |
| <b>Patient origin</b>                                                        |              |              |              |
| In-house patient                                                             | 15 (27.3%)   | 20 (50.0%)   | 35 (36.8%)   |
| Referred from external hospital                                              | 40 (72.7%)   | 20 (50.0%)   | 60 (63.2%)   |
| <b>Patient origin (specified)</b>                                            |              |              |              |
| Intra-cantonal                                                               | 18 (45.0%)   | 7 (36.8%)    | 25 (42.4%)   |
| Extra-cantonal                                                               | 22 (55.0%)   | 12 (63.2%)   | 34 (57.6%)   |
| <b>Distance to referring hospital (km)</b>                                   |              |              |              |
| Median [Min, Max]                                                            | 42 [23, 238] | 48 [23, 238] | 42 [23, 238] |
| Mean (SD)                                                                    | 59.4 (52.8)  | 65.7 (58.5)  | 61.5 (54.3)  |
| <b>Place of treatment</b>                                                    |              |              |              |
| RT at referring institution, dHT at KSA                                      | 22 (40.0%)   | 18 (45.0%)   | 40 (42.1%)   |
| dHT+RT at KSA                                                                | 27 (49.1%)   | 22 (55.0%)   | 49 (51.6%)   |
| HT and only RT at the same day at KSA, remaining RT at referring institution | 6 (10.9%)    | 0 (0%)       | 6 (6.3%)     |
| <b>All prescribed dHT sessions received</b>                                  |              |              |              |
| No                                                                           | 4 (7.3%)     | 2 (5.0%)     | 6 (6.3%)     |
| Yes                                                                          | 51 (92.7%)   | 38 (95.0%)   | 89 (93.7%)   |

Abbreviations: dHT: deep hyperthermia, dHT+RT: combined dHT and RT, ECOG: Eastern Cooperative Oncology Group, Intra and extra-cantonal: cantons in Switzerland are equivalent to states, provinces or regions in other countries, KSA: Kantonsspital Aarau (= dHT center), Others: the definition is given in the text, RT: radiotherapy, SD: standard deviation.

**Table S5.** Summary of applied deep hyperthermia and combined radiotherapy (dHT+RT) treatment schedules of the 71 patients treated by specific reimbursed dHT indication. One patient stopped dHT+RT after three RT fractions due to reasons unrelated to treatment and was therefore excluded from the treatment schedule analysis. As far as possible, groups of similar schedules were formed and numbers of respective patients noted in the 1<sup>st</sup> column. If too many different schedules existed, they were taken together and denoted with patient numbers and "(mix)", giving ranges with maximum and minimum. If available, the corresponding study was referred.

| Cervical cancer |         |              |                 |                      |               |             |              |                 |                  |        |         |
|-----------------|---------|--------------|-----------------|----------------------|---------------|-------------|--------------|-----------------|------------------|--------|---------|
| Nos.            | Fx      | Dose/fx (Gy) | Total dose (Gy) | Included boost       | RT**frequency | RT modality | dHT sessions | dHT frequency** | Treatment intent | Re-RT  | Ref     |
| 1x              | 25      | 1.8 Gy       | 45 Gy           | Brachy               | 5             | EBRT        | 5            | 1x              | curativ          | yes    | [12]    |
| 1x              | 28      | 1.8 Gy       | 50.4 Gy         |                      | 5             | EBRT        | 5            | 1x              | curativ          | no     |         |
| Bladder cancer  |         |              |                 |                      |               |             |              |                 |                  |        |         |
| Nos.            | Fx      | Dose/fx (Gy) | Total dose (Gy) | Included boost       | RT**frequency | RT modality | dHT sessions | dHT frequency** | Treatment intent | Re-RT  | Ref     |
| 3x              | 16      | 3 Gy         | 48 Gy           | 4 × 3 Gy = 12 Gy     | 4             | EBRT        | 4            | 1x              | curativ          | no     | [26]    |
| 2x              | 20      | 2.5 Gy       | 50 Gy           | 6 × 1.8 Gy = 10.8 Gy | 5             | EBRT        | 2*, 5        | 1x              | curativ          | no     | [26]    |
| 4x              | 31      | 1.8 Gy       | 55.8 Gy         |                      | 5             | EBRT        | 1*, 5-7      | 1x              | curativ          | no     | [51]    |
| 2x              | 31      | 1.8 Gy       | 58.2 Gy         |                      | 5             | EBRT        | 3*, 6        | 1x              | curativ          | no     | [51]    |
| 2x(mix)         | 16-33   | 1.8-2.5 Gy   | 40-59.4 Gy      | yes                  | 4-5           | EBRT        | 4-8          | 1-2x            | cur/pall         | no     |         |
| Rectal cancer   |         |              |                 |                      |               |             |              |                 |                  |        |         |
| Nos.            | Fx      | Dose/fx (Gy) | Total dose (Gy) | Included boost       | RT**frequency | RT modality | dHT sessions | dHT frequency** | Treatment intent | Re-RT  | Ref     |
| 6x              | 25      | 1.8 Gy       | 45 Gy           | 3 × 1.8 Gy = 5.4 Gy  | 5             | EBRT        | 5-8          | 1-2x            | cur/pall         | yes/no | [31,52] |
| 2x              | 28      | 1.8 Gy       | 50.4 Gy         |                      | 5             | EBRT        | 6-7          | 1-2x            | cur/pall         | yes/no |         |
| 4x(mix)         | 12-30   | 1.8-2.5 Gy   | 24-54 Gy        |                      | 5             | EBRT        | 4-10         | 1-2x            | cur/pall         | yes/no |         |
| 2x(mix)         | 4 (bid) | 7.5-9 Gy     | 30-36 Gy        |                      | 1             | Brachy      | 1            | 1x              | pall             | yes    |         |
| Sarcoma         |         |              |                 |                      |               |             |              |                 |                  |        |         |
| Nos.            | Fx      | Dose/fx (Gy) | Total dose (Gy) | Included boost       | RT**frequency | RT modality | dHT sessions | dHT frequency** | Treatment intent | Re-RT  | Ref     |
| 5x              | 25      | 2 Gy         | 50 Gy           |                      | 5             | EBRT, PT    | 1*, 5-10     | 1-2x            | curativ          | no     | [33]    |
| 3x(mix)         | 33-38   | 2-2.15 Gy    | 70-76Gy         |                      | 4-5           | PT          | 7-8          | 1x              | 2x cur, 1x pall  | yes/no | [34,53] |

| Pancreatic cancer                      |         |              |                 |                |               |             |              |                 |                  |        |         |
|----------------------------------------|---------|--------------|-----------------|----------------|---------------|-------------|--------------|-----------------|------------------|--------|---------|
| Nos.                                   | Fx      | Dose/fx (Gy) | Total dose (Gy) | Included boost | RT**frequency | RT modality | dHT sessions | dHT frequency** | Treatment intent | Re-RT  | Ref     |
| 6x                                     | 28      | 2 Gy         | 56 Gy           |                | 5             | EBRT        | 4-6          | 1x              | 5x cur; 1x pall  | no     | [36,50] |
| 2x(mix)                                | 25-28   | 1.8 – 2 Gy   | 50 – 50.4 Gy    |                | 5             | EBRT        | 5-6          | 1x              | cur              | no     | [36,50] |
| Local tumor recurrence and compression |         |              |                 |                |               |             |              |                 |                  |        |         |
| Nos.                                   | Fx      | Dose/fx (Gy) | Total dose (Gy) | Included boost | RT**frequency | RT modality | dHT sessions | dHT frequency** | Treatment intent | Re-RT  | Ref     |
| 2x                                     | 15      | 2 Gy         | 30 Gy           |                | 5x            | EBRT        | 4-5          | 1-2x            | pall             | yes    |         |
| 3x                                     | 13      | 3 Gy         | 39 Gy           |                | 5x            | EBRT        | 4-5          | 1-2x            | pall             | yes/no |         |
| 2x                                     | 27      | 2 Gy         | 54 Gy           |                | 5x            | EBRT        | 6-8          | 1-2x            | pall             | no     |         |
| 1x                                     | 35      | 2 Gy         | 70 Gy           |                | 5x            | PT          | 8            | 1x              | pall             | yes    |         |
| 1x                                     | 4 (bid) | 7 Gy         | 28 Gy           |                | 1x            | Brachy      | 1            | 1x              | pall             | yes    |         |
| 1x                                     | 4       | 7.5 Gy       | 30 Gy           |                | 2x            | SBRT        | 1            | 1x              | pall             | yes    |         |
| 8x(mix)                                | 10-33   | 1.8-3 Gy     | 25-59.4 Gy      | yes            | 5x            | EBRT, 1x PT | 3*, 3-8      | 1-2x            | pall             | yes/no |         |
| Painful bony metastasis                |         |              |                 |                |               |             |              |                 |                  |        |         |
| Nos.                                   | Fx      | Dose/fx (Gy) | Total dose (Gy) | Included boost | RT**frequency | RT modality | dHT sessions | dHT frequency** | Treatment intent | Re-RT  | Ref     |
| 2x                                     | 12      | 2.5 Gy       | 30 Gy           |                | 5x            | EBRT        | 5            | 2x              | pall             | yes    |         |
| 1x                                     | 5       | 2.5 Gy       | 12.5 Gy         |                | 2x            | EBRT        | 5            | 2x              | pall             | yes    |         |
| 4x(mix)                                | 11-27   | 2-3 Gy       | 33 – 54 Gy      |                | 5x            | EBRT        | 4-10         | 1-2x            | pall             | no     | [39]    |

Abbreviations: bid: bis in die (twice per day), Brachy: HDR-Brachytherapy, dHT: deep hyperthermia, EBRT: external body radiotherapy, Fx: fraction, Gy: Gray, mix: several treatment schedules are depicted together, Nos.: numbers, pall: palliative intention, PT: proton therapy, RT: radiotherapy, re-RT: re-irradiation, Ref: reference, SBRT: stereotactic body radiotherapy, \*: HT interrupted, \*\* times per week.
